# Supplementary material for: Ultrafast excited state relaxation dynamics of pyran-based D–π–A systems: solvent polarity controls the triplet state
Source: Royal Society of Chemistry journal article supplement (doi:10.1039/d3cp04338j), 2024-01-01
Supplement: d3cp04338j1.pdf [file d3cp04338j1.pdf]

# Supporting Information

## **Ultrafast Excited State Relaxation Dynamics of Pyran Based D- $\pi$ -A Systems: Solvent Polarity Controls Triplet State**

Pookalavan Karicherry Vineetha<sup>a</sup>, Chinju Govind<sup>b</sup>, Venugopal Karunakaran<sup>b,c,\*</sup>,  
Narayanapillai Manoj<sup>a,\*</sup>,

<sup>a</sup>Department of Applied Chemistry and Inter University Centre for Nanomaterials and Devices, CUSAT, Kochi – 682022, Kerala, India. <sup>b</sup>Photosciences and Photonics Section, Chemical Sciences and Technology Division, CSIR-National Institute for Interdisciplinary Science and Technology, Thiruvananthapuram-695 019, Kerala, India, <sup>c</sup>Academy of Scientific and Innovative Research (AcSIR), Ghaziabad- 201002, India.

## Table of content

|            |                                                                                                                                                                                                      |    |
|------------|------------------------------------------------------------------------------------------------------------------------------------------------------------------------------------------------------|----|
|            | Synthesis and characterization                                                                                                                                                                       | 4  |
| Scheme S1  | Synthesize of 5-(2,6-bis((E)-4-(diphenylamino)styryl)-4H-pyran-4-ylidene)pyrimidine-2,4,6(1H,3H,5H)-trione, <b>TPAPBA (3)</b> .                                                                      | 4  |
| Scheme S2  | Synthesize of 5-(2,6-bis(4-(diethylamino)styryl)-4H-pyran-4-ylidene)pyrimidine-2,4,6(1H,3H,5H)-trione, <b>EAPBA (5)</b> .                                                                            | 5  |
| Figure S1  | <sup>1</sup> H NMR spectrum (400 MHz) of <b>TPAPBA</b> in DMSO                                                                                                                                       | 6  |
| Figure S2  | <sup>13</sup> C NMR spectrum (125 MHz) of <b>TPAPBA</b> in CDCl <sub>3</sub>                                                                                                                         | 7  |
| Figure S3  | <sup>1</sup> H NMR spectrum (400 MHz) of <b>EAPBA</b> in CDCl <sub>3</sub>                                                                                                                           | 7  |
| Figure S4  | <sup>13</sup> C NMR spectrum (125 MHz) of <b>EAPBA</b> in DMSO                                                                                                                                       | 8  |
| Figure S5  | Absorption and Excitation spectra of <b>TPAPBA</b> and <b>EAPBA</b> in toluene.                                                                                                                      | 8  |
| Figure S6  | Fluorescence decay profiles of <b>TPAPBA</b> by exciting 330 nm probed at (a) 440 nm and (b) 660 nm.                                                                                                 | 9  |
| Figure S7  | Fluorescence decay profiles of <b>EAPBA</b> by exciting 330 nm probed at (a) 440 nm and (b) 660 nm.                                                                                                  | 9  |
| Figure S8  | Plot of Stokes shift ( $\Delta\nu$ ) versus the orientational polarizability ( $\Delta f$ ) of <b>TPAPBA</b> and <b>EAPBA</b> in various solvents.                                                   | 9  |
| Figure S9  | Decay profile at 620 nm for <b>TPAPBA</b> in MeCN. (a) Argon saturated [O <sub>2</sub> ] = 0 mM, (b) Air saturated [O <sub>2</sub> ] = 1.80 mM and (c) Oxygen saturated [O <sub>2</sub> ] = 9.23 mM. | 10 |
| Figure S10 | Stern -Volmer plot for oxygen quenching of <b>TPAPBA</b> triplet excited states in toluene.                                                                                                          | 10 |

|            |                                                                                                                                                                                            |    |
|------------|--------------------------------------------------------------------------------------------------------------------------------------------------------------------------------------------|----|
| Figure S11 | Decay profile at 620 nm for <b>EAPBA</b> in MeCN. <b>(a)</b> Argon saturated $[O_2] = 0$ mM, <b>(b)</b> Air saturated $[O_2] = 1.80$ mM and <b>(c)</b> Oxygen saturated $[O_2] = 9.23$ mM. | 11 |
| Figure S12 | Stern -Volmer plot for oxygen quenching of <b>EAPBA</b> triplet excited states in toluene                                                                                                  | 11 |
| Figure S13 | Steady-state emission spectra of <b>TPAPBA</b> and <b>EAPBA</b> were measured at 77 K.                                                                                                     | 11 |
| Figure S14 | Nanosecond transient absorption spectra of <b>TPAPBA</b> obtained by laser flash photolysis at 355 nm in Ar-saturated MeCN shown on different time scales.                                 | 12 |
| Figure S15 | Nanosecond transient absorption spectra of <b>EAPBA</b> obtained by laser flash photolysis at 355 nm in Ar-saturated MeCN shown on different time scales.                                  | 12 |
| Figure S16 | Decay-associated spectra of <b>EAPBA</b> and <b>TPAPBA</b> in toluene and MeCN obtained from global analysis.                                                                              | 13 |
| Table S1   | Comparison of theoretical absorption spectra and effect of solvent polarity using B3LYP/ 6311g (d,p) and CAM B3LYP/ 6311g (d,p)                                                            | 13 |
| Table S2   | DFT dipole moment ( $\mu$ ) and characteristic bond lengths of <b>TPAPBA</b> and <b>EAPBA</b> in gas phase.                                                                                | 13 |
| Table S3   | Fluorescence lifetime data for <b>TPAPBA</b> in different solvents obtained by excitation at 330 nm and monitoring at 440 nm and 660 nm.                                                   | 14 |
| Table S4   | Fluorescence lifetime data for <b>EAPBA</b> in different solvents obtained by excitation at 330 nm and monitoring at 440 nm and 660 nm.                                                    | 14 |
|            | References                                                                                                                                                                                 | 14 |

## Synthesis and Characterization

TPAPBA (3) EAPBA (5) and were synthesized based on methods reported in the literature.<sup>1-2</sup> A mixture of appropriate aldehyde (10 mmol) and active methylene compound 2 (4 mmol), in 20 mL of toluene, acetic acid (0.17 mL; 3mmol) and piperidine (0.35 mL; 3.5 mmol) were refluxed under N<sub>2</sub> atmosphere for 48 h. The reaction mixture was allowed to cool to room temperature, poured into distilled water and extracted with chloroform. The organic extracts were washed several times with distilled water, dried over anhydrous sodium sulphate and the solvent was removed under vacuum. The residue obtained was subjected to column chromatography using 60-120 mesh silica gel with ethyl acetate: hexane (3:1) as the eluent. The solid obtained was reprecipitated from chloroform using hexane.

Synthesize of 5-(2,6-bis((E)-4-(diphenylamino)styryl)-4H-pyran-4-ylidene)pyrimidine-2,4,6(1H,3H,5H)-trione, TPAPBA (3).

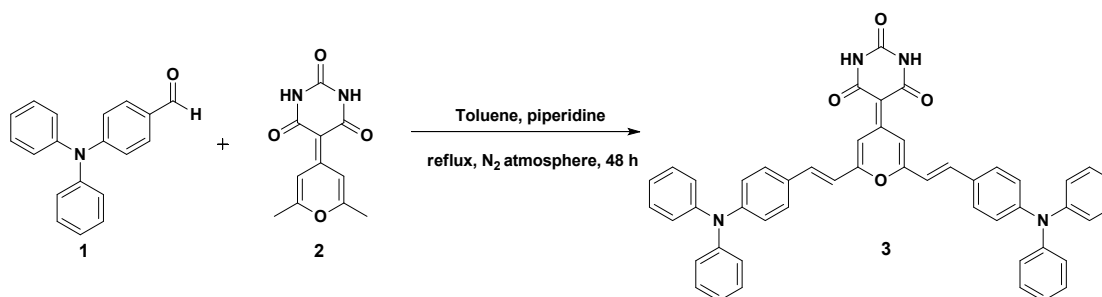

### Scheme S1 Synthesis of TPAPBA

It was synthesized from 4-(diphenylamino)benzaldehyde based on the procedure given above. Yield: 55%; dark red solid.

FT-IR (KBr,  $\nu_{\max}$  cm<sup>-1</sup>): 3310, 3180, 1598, 1390, 1328, 1105, 1069, 997, 700.

<sup>1</sup>H NMR (400MHz, DMSO-*d*<sub>6</sub>)  $\delta$  (ppm): 10.59 (s, 1H), 8.83 (s, 1H), 7.80 (d, *J* = 8.4 Hz, 2H), 7.42 (t, *J* = 7.8 Hz, 4H), 7.21-7.15 (m, 7H), 6.97 (d, *J* = 8.4 Hz, 3H) ppm.

$^{13}\text{C}$  NMR (125 MHz,  $\text{CDCl}_3$ ):  $\delta$  = 167.73, 163.94, 160.42, 148.96, 145.73, 128.53, 128.12, 126.78, 124.54, 123.24, 120.53, 116.16.

HRMS (ESI MS):  $m/z$  calcd. for  $\text{C}_{49}\text{H}_{36}\text{N}_4\text{O}_4$  744.2745, found  $[\text{M} + \text{H}]^+$  745.28076.

Synthesize of 5-(2,6-bis(4-(diethylamino)styryl)-4H-pyran-4-ylidene) pyrimidine-2,4,6(1H,3H,5H)-trione, EAPBA (5).

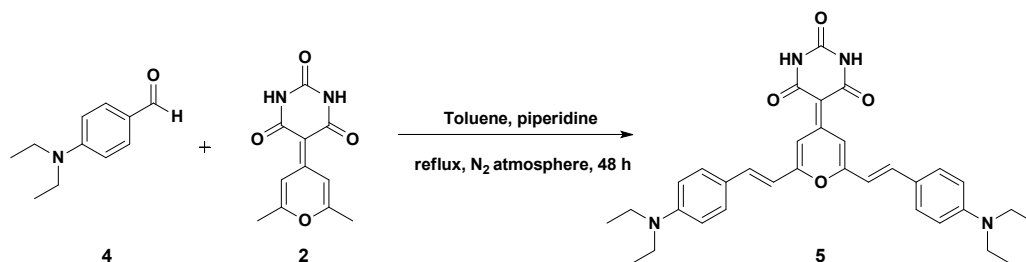

Scheme S2 Synthesis of EAPBA

EAPBA (5) was synthesized from 4-(diethylamino)benzaldehyde based on the procedure given above. Yield: 40%. Blue solid.

FT-IR (KBr,  $\nu_{\text{max}}$   $\text{cm}^{-1}$ ): 3310, 3185, 1598, 1396, 1339, 1110, 1074, 705.

$^1\text{H}$  NMR (400MHz,  $\text{CDCl}_3$ )  $\delta$  (ppm): 8.69 (s, 1H), 7.97 (s, 1H), 7.45-7.38 (m, 3H), 6.62-6.58 (m, 3H), 3.35 (q, 4H), 1.14 (t, 6H).

$^{13}\text{C}$  NMR (125 MHz,  $\text{DMSO } d_6$ ):  $\delta$  (ppm): 181.13, 173.69, 165.40, 158.43, 155.73, 149.68, 147.24, 126.32, 124.56, 109.12, 93.42, 54.42, 20.23.

LCMS (ESI-MS)  $m/z$ : calcd. for  $\text{C}_{33}\text{H}_{36}\text{N}_4\text{O}_4$  552.274, found  $[\text{M} + \text{H}]^+$  553.12.

## $^1\text{H}$ and $^{13}\text{C}$ NMR spectra

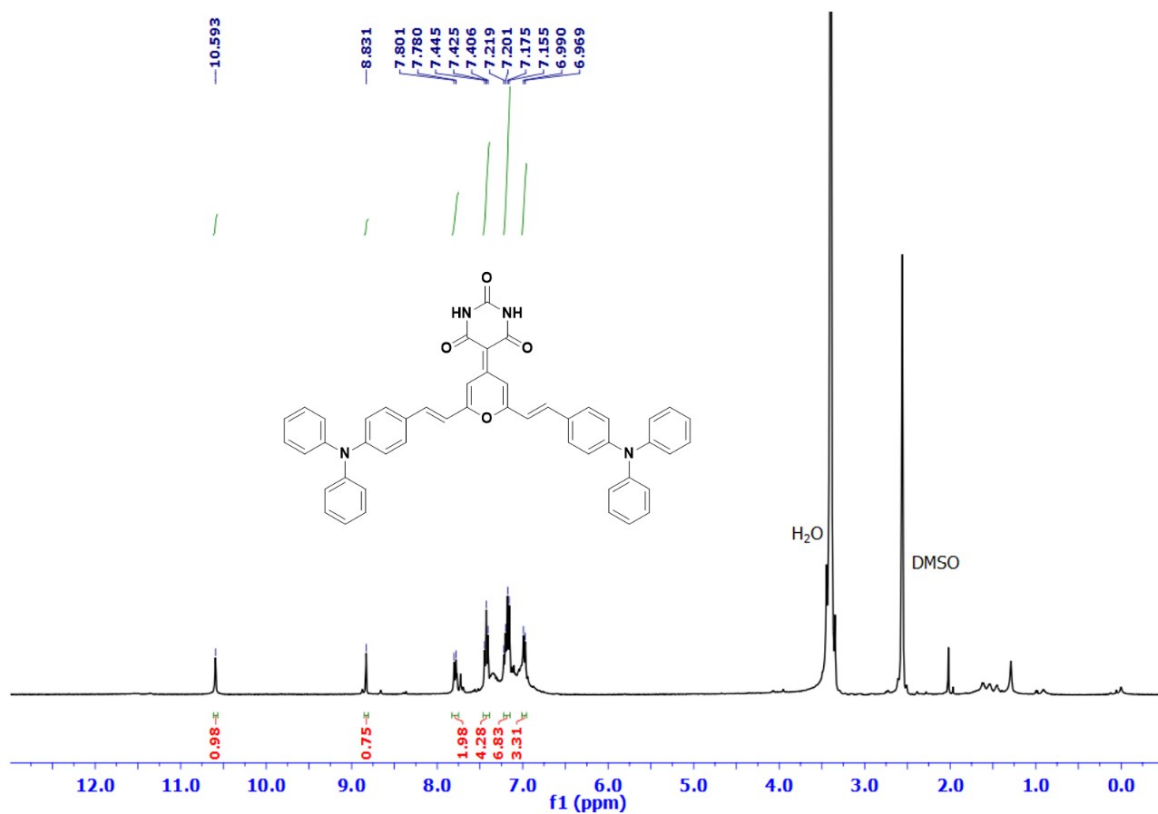

**Figure S1**  $^1\text{H}$  NMR spectrum (400 MHz) of TPAPBA in DMSO

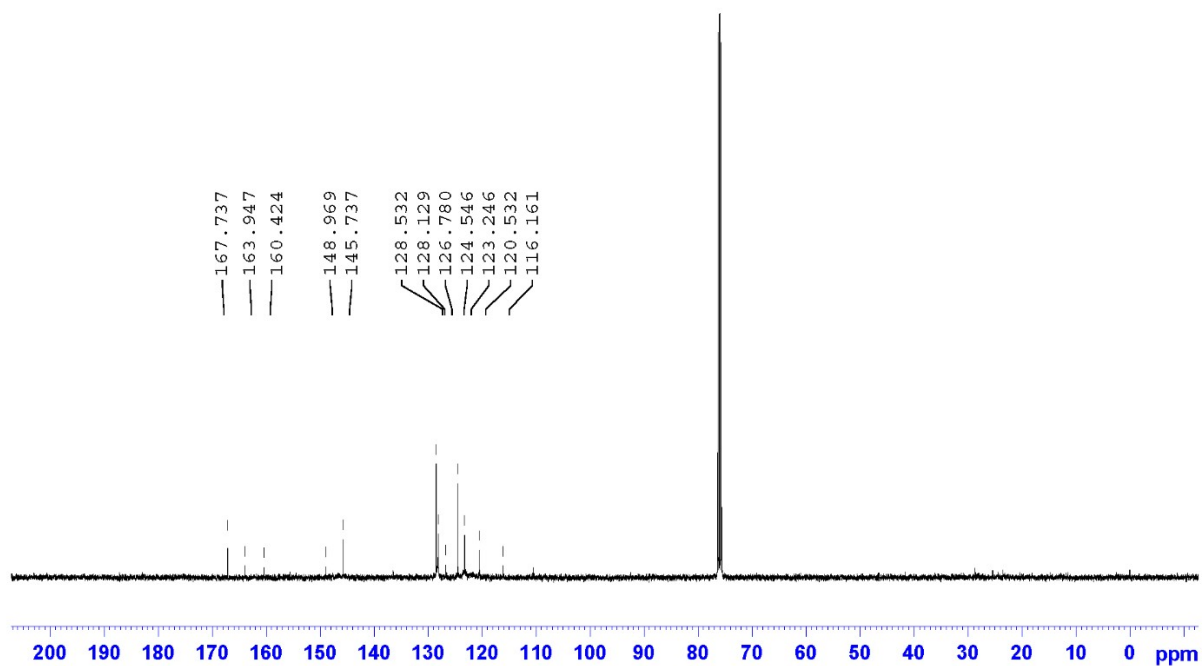

**Figure S2**  $^{13}\text{C}$  NMR spectrum ((125 MHz) of TPAPBA in  $\text{CDCl}_3$

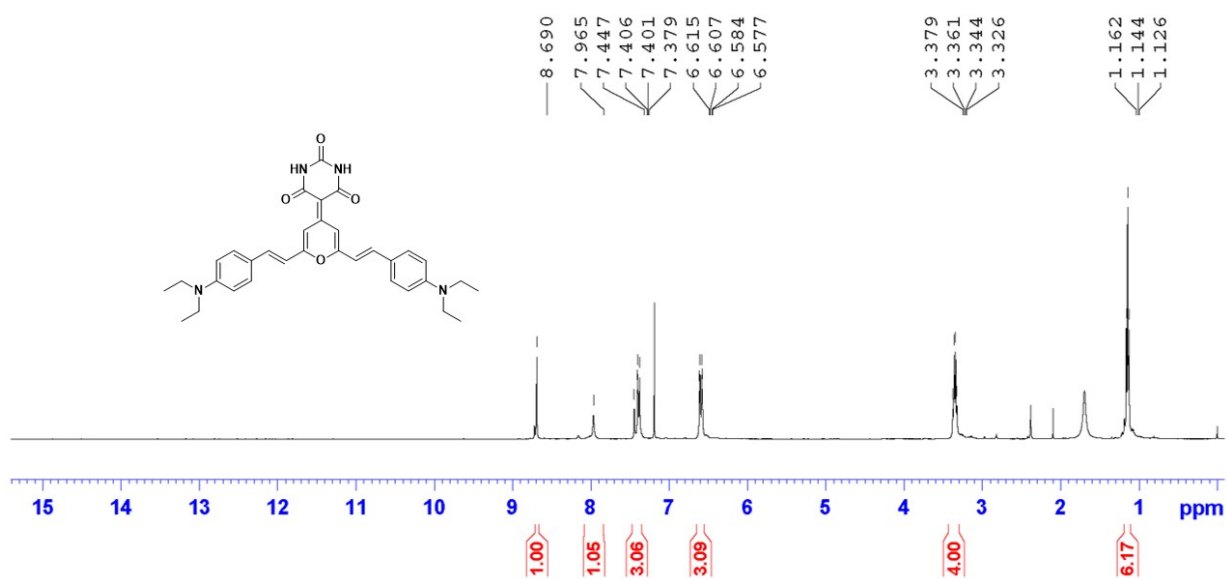

**Figure S3**  $^1\text{H}$  NMR spectrum (400MHz) of EAPBA in  $\text{CDCl}_3$

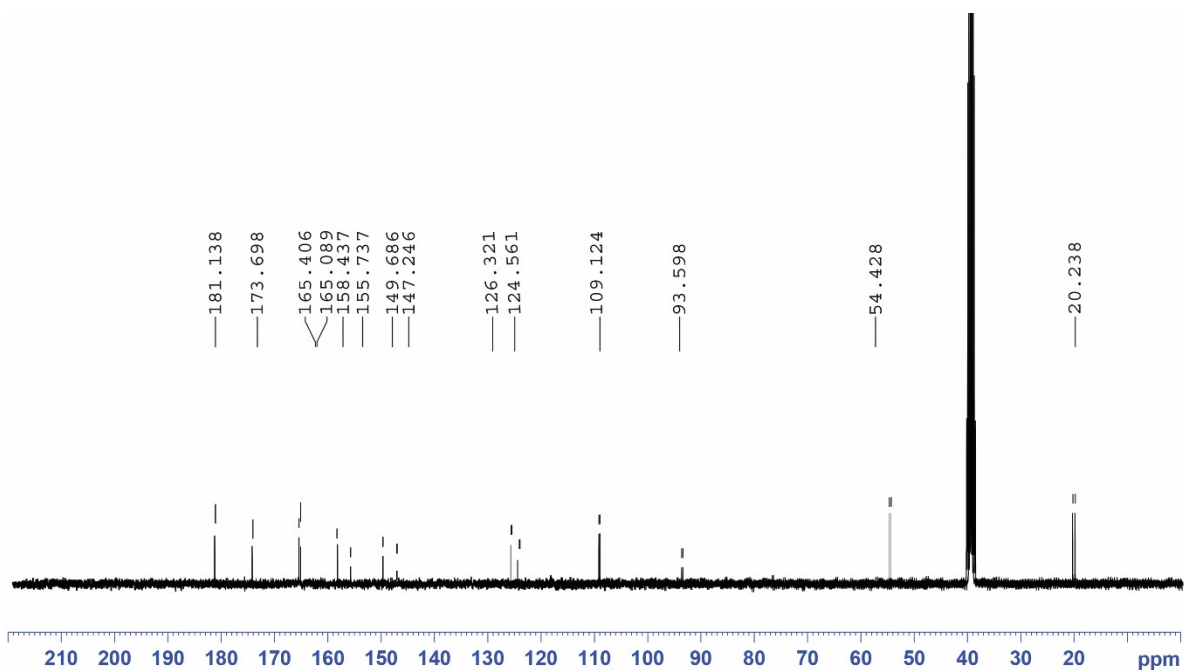

**Figure S4**  $^1\text{H}$  NMR spectrum (125 MHz) of EAPBA in  $\text{DMSO } d_6$

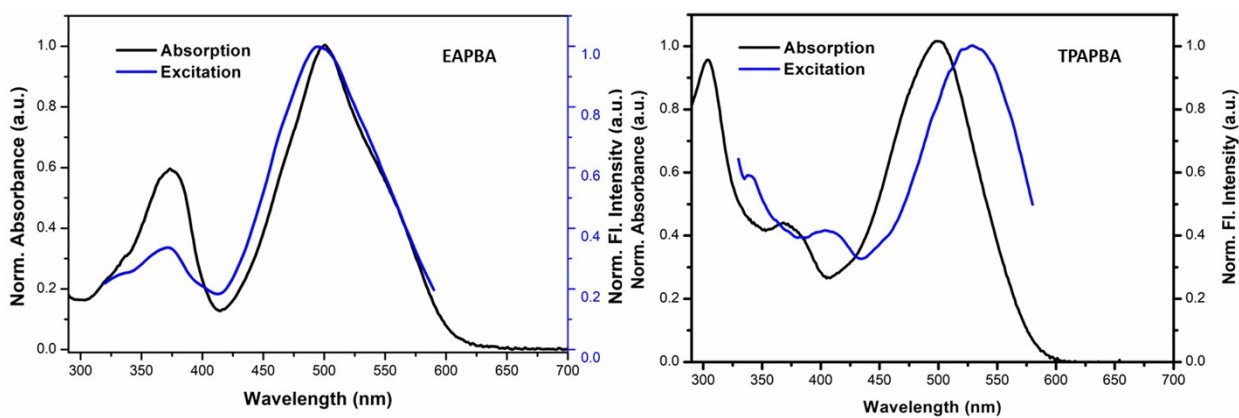

**Figure S5** Absorption and Excitation spectra of EAPBA and TPAPBA in toluene

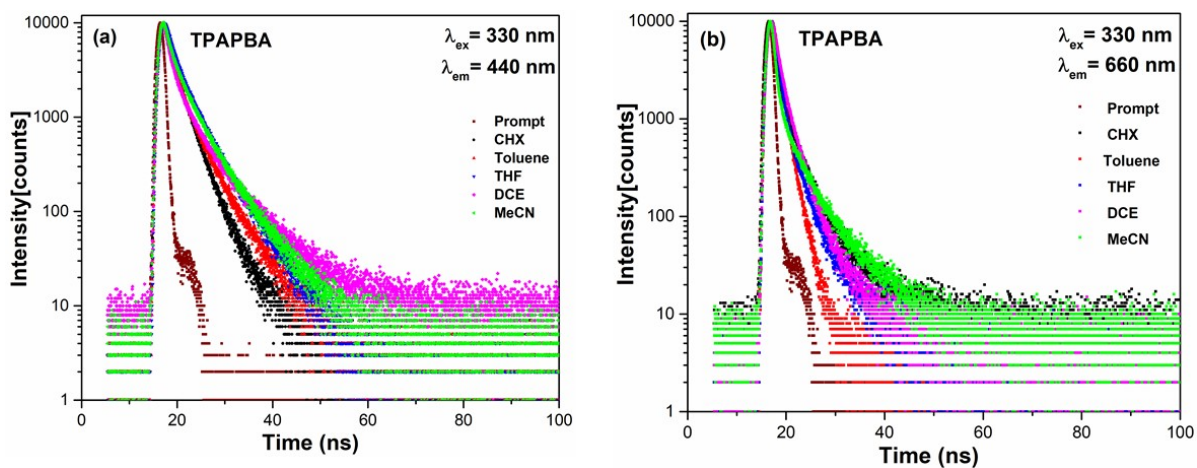



**Figure S6** Fluorescence decay profiles of TPAPBA by exciting 330 nm probed at (a) 440 nm and (b) 660 nm.

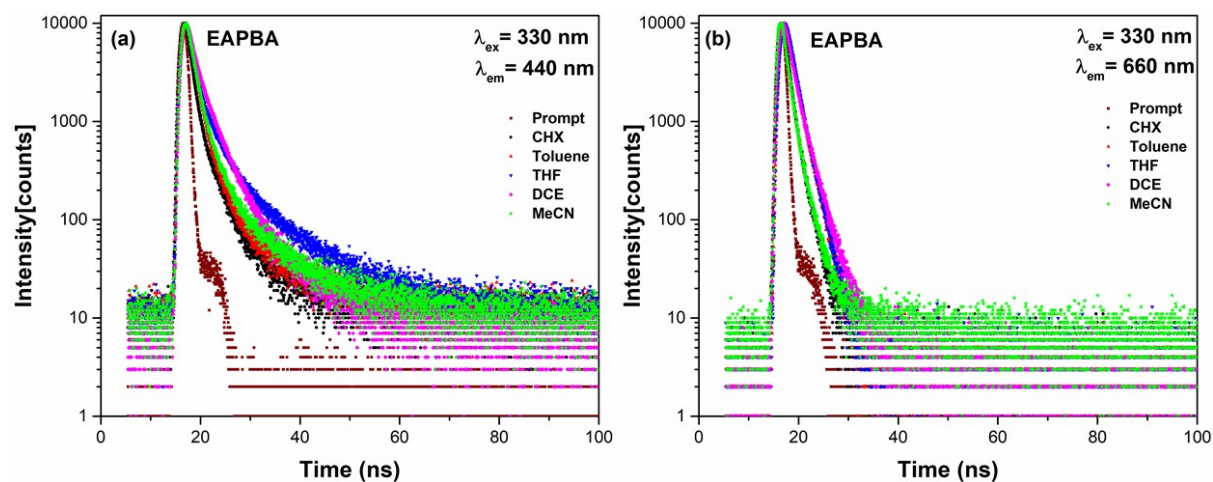

**Figure S7** Fluorescence decay profiles of EAPBA by exciting 330 nm probed at (a) 440 nm and (b) 660 nm.

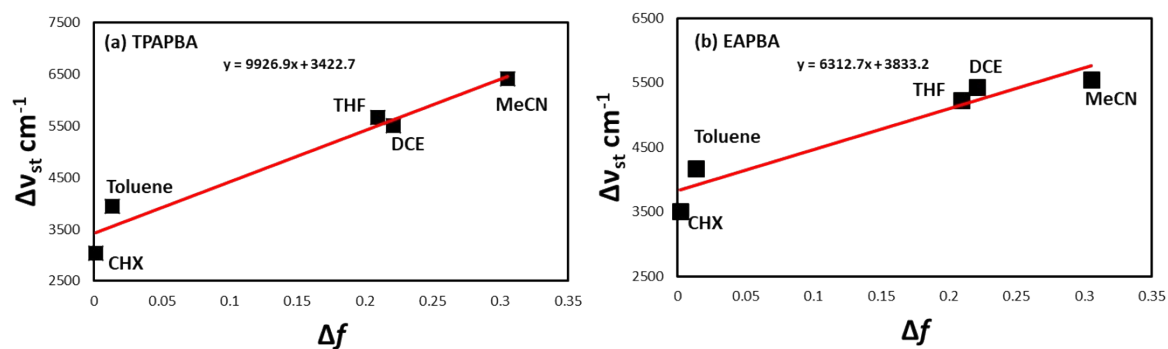

**Figure S8** Plot of Stokes shift ( $\Delta\nu$ ) versus the orientational polarizability ( $\Delta f$ ) of TPAPBA and EAPBA in various solvents.

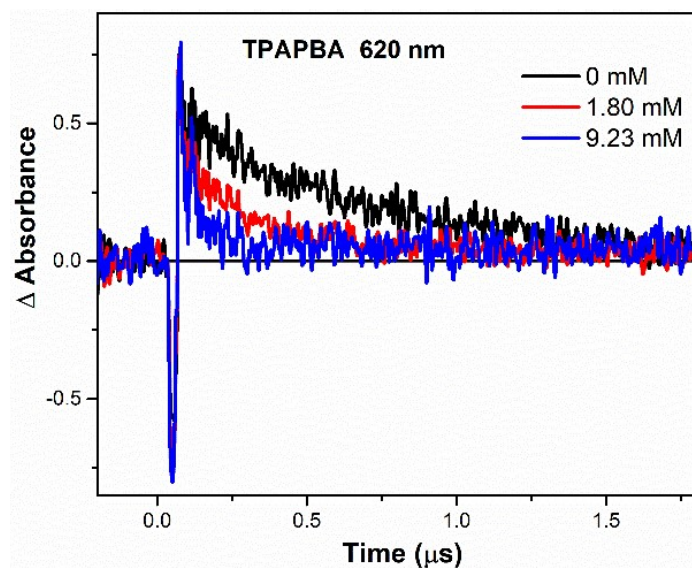

**Figure S9** Decay profile at 620 nm for TPAPBA in MeCN. (a) Argon saturated  $[O_2] = 0$  mM, (b) Air saturated  $[O_2] = 1.80$  mM and (c) Oxygen saturated  $[O_2] = 9.23$  mM.

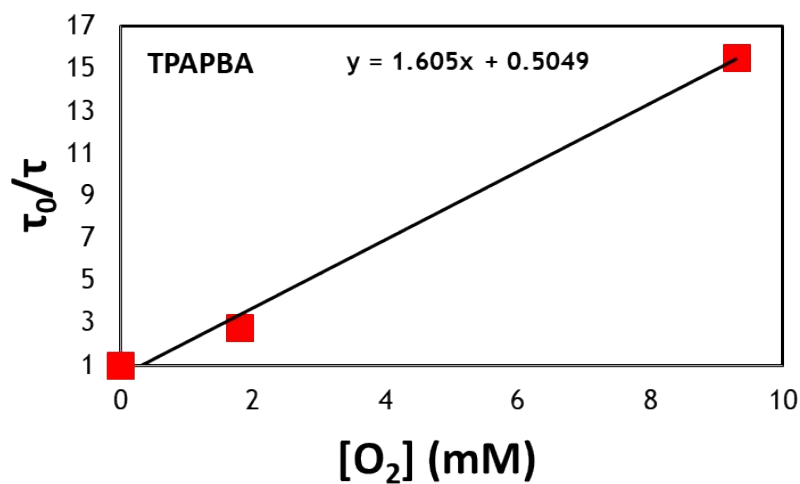

**Figure S10** Stern -Volmer plot for oxygen quenching of TPAPBA triplet excited states in toluene.

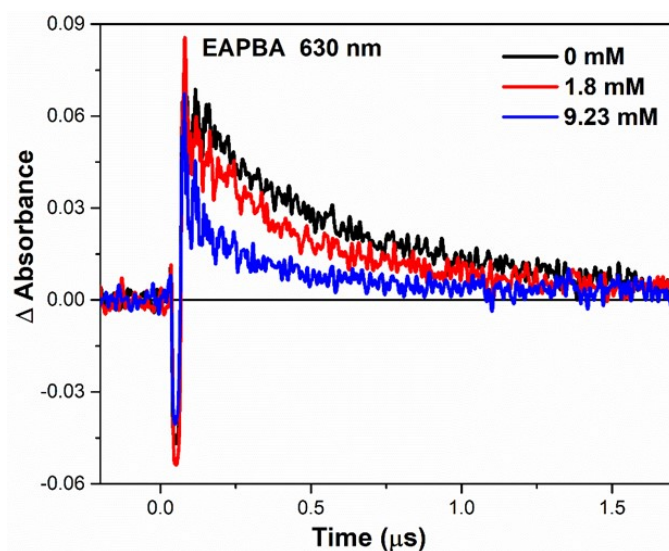

**Figure S11** Decay profile at 620 nm for **EAPBA** in MeCN. (a) Argon saturated  $[O_2] = 0$  mM, (b) Air saturated  $[O_2] = 1.80$  mM and (c) Oxygen saturated  $[O_2] = 9.23$  mM.

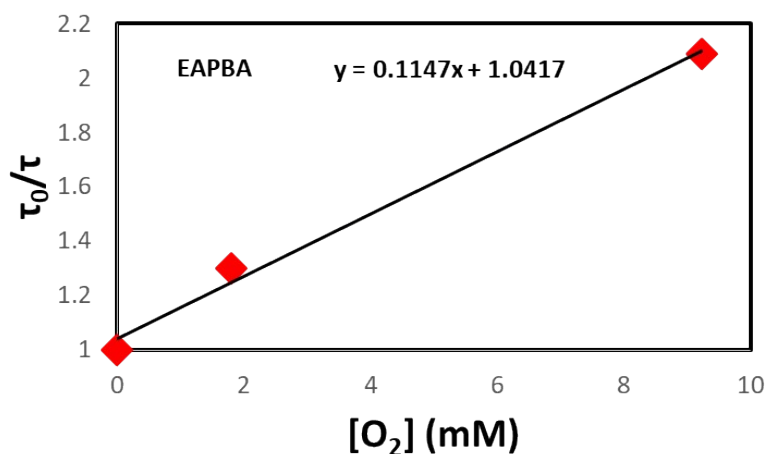

**Figure S12** Stern -Volmer plot for oxygen quenching of **EAPBA** triplet excited states in toluene

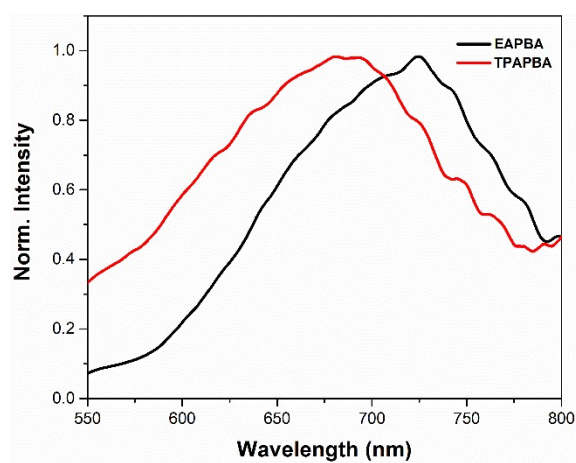

**Figure S13** Steady state emission spectra of **TPAPBA** and **EAPBA** measured at 77 K.

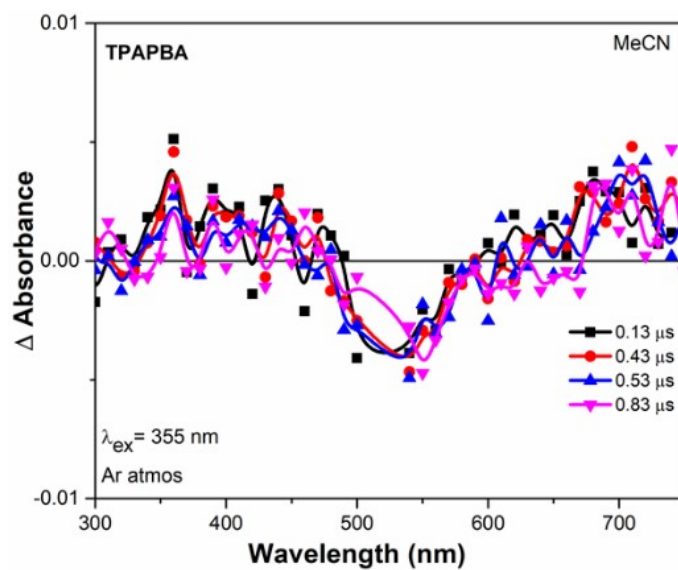

**Figure S14** Nanosecond transient absorption spectra of **TPAPBA** obtained by laser flash photolysis at 355 nm in Ar saturated MeCN shown on different time scales.

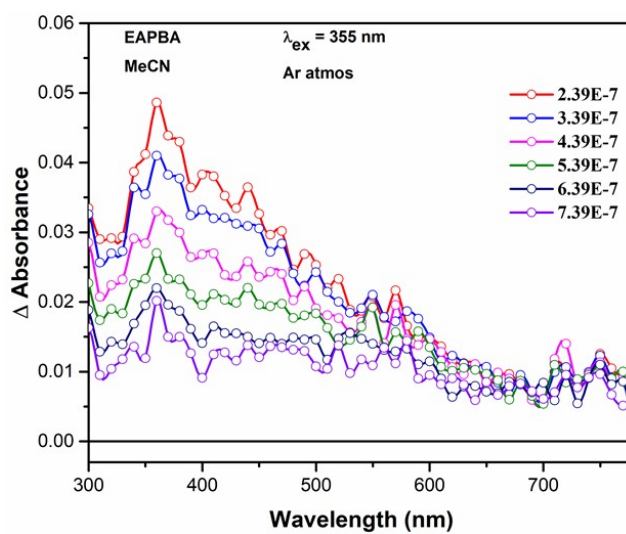

**Figure S15** Nanosecond transient absorption spectra of **EAPBA** obtained by laser flash photolysis at 355 nm in Ar saturated MeCN shown on different time scales.

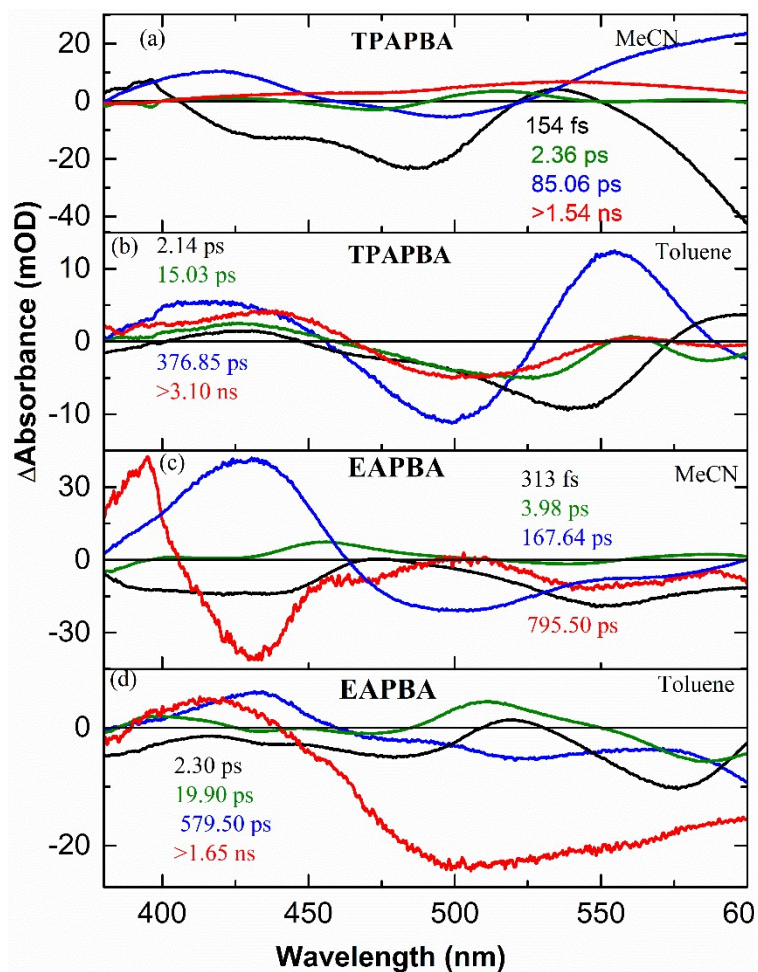

**Figure S12** Decay-associated spectra of **EAPBA** and **TPAPBA** in toluene and MeCN obtained from global analysis.

**Table S1** Comparison of theoretical absorption spectra and effect of solvent polarity using B3LYP/ 6-311g (d,p) and CAM B3LYP/ 6-311g (d,p)

| Compound     | $\lambda_{max}^{Abs}$ , nm<br>(f)<br>Gas Phase | $\lambda_{max}^{Abs}$ , nm<br>(f), Toluene | $\lambda_{max}^{Abs}$ , nm<br>(f), MeCN | $\lambda_{max}^{Abs}$ , nm<br>(f)<br>Gas Phase | $\lambda_{max}^{Abs}$ , nm<br>(f), Toluene | $\lambda_{max}^{Abs}$ , nm<br>(f), MeCN |
|--------------|------------------------------------------------|--------------------------------------------|-----------------------------------------|------------------------------------------------|--------------------------------------------|-----------------------------------------|
|              | <b>CAM B3LYP<br/>6-311g (d,p)</b>              |                                            |                                         | <b>B3LYP/ 6-311g (d,p)</b>                     |                                            |                                         |
| <b>EAPBA</b> | 323 (0.16)                                     | 323 (0.11)                                 | 325 (0.18)                              | 390 (0.69)                                     | 399 (1.24)                                 | 397 (1.39)                              |
|              | 397 (0.93)                                     | 410 (1.89)                                 | 421 (1.52)                              | 487 (0.63)                                     | 519 (0.84)                                 | 521 (0.67)                              |
|              | 450 (1.62)                                     | 467 (1.02)                                 | 481 (0.95)                              | 547 (0.69)                                     | 599 (0.79)                                 | 603 (0.77)                              |
|              |                                                |                                            |                                         |                                                |                                            |                                         |

|               |            |            |            |            |            |            |
|---------------|------------|------------|------------|------------|------------|------------|
| <b>TPAPBA</b> | 336 (0.15) | 349 (0.1)  | 360 (0.18) | 399 (1.07) | 414 (1.06) | 417 (1.00) |
|               | 410 (0.58) | 435 (1.18) | 444 (1.27) | 502 (0.56) | 530 (0.78) | 541 (0.66) |
|               | 463 (1.94) | 504 (2.08) | 566 (2.12) | 552 (0.76) | 587 (0.85) | 607 (0.84) |

**Table S2** DFT dipole moment  $\mu$  and characteristic bond lengths of **TPAPBA** and **EAPBA** in gas phase

| Dipole moment ( $\mu$ , D) | Gas phase | Toluene | MeCN  |
|----------------------------|-----------|---------|-------|
| TPAPBA                     | 20.38     | 20.20   | 21.77 |
| EAPBA                      | 13.19     | 15.04   | 16.79 |

**Table S3** Fluorescence lifetime data for **TPAPBA** in different solvents obtained by excitation at 330 nm and monitoring at 440 nm and 660 nm.

| Solvent                    | CHX<br>( $\pm 0.01$ ) ns | Toluene<br>( $\pm 0.01$ ) ns | THF<br>( $\pm 0.01$ ) ns | DCE<br>( $\pm 0.01$ ) ns | MeCN<br>( $\pm 0.01$ ) ns |
|----------------------------|--------------------------|------------------------------|--------------------------|--------------------------|---------------------------|
| $\lambda_{em} = 440$<br>nm | $\tau_1 = 0.41$ (44%)    | $\tau_1 = 0.49$ (24%)        | $\tau_1 = 0.30$ (34%)    | $\tau_1 = 0.41$ (24%)    | $\tau_1 = 0.19$ (26%)     |
|                            | $\tau_2 = 1.43$ (47%)    | $\tau_2 = 1.50$ (69%)        | $\tau_2 = 2.11$ (48%)    | $\tau_2 = 2.36$ (62%)    | $\tau_2 = 1.58$ (63%)     |
|                            | $\tau_3 = 5.93$ (9%)     | $\tau_3 = 8.90$ (7%)         | $\tau_3 = 9.50$ (18%)    | $\tau_3 = 6.80$ (14%)    | $\tau_3 = 8.42$ (11%)     |
|                            | $\tau_{av} = 1.38$       | $\tau_{av} = 1.77$           | $\tau_{av} = 2.82$       | $\tau_{av} = 2.51$       | $\tau_{av} = 1.97$        |
| $\lambda_{em} = 660$<br>nm | $\tau_1 = 0.16$ (53%)    | $\tau_1 = 0.35$ (14%)        | $\tau_1 = 0.12$ (16%)    | $\tau_1 = 0.68$ (12%)    | $\tau_1 = 0.52$ (15%)     |
|                            | $\tau_2 = 1.32$ (47%)    | $\tau_2 = 2.80$ (65%)        | $\tau_2 = 2.67$ (84%)    | $\tau_2 = 2.83$ (69%)    | $\tau_2 = 2.79$ (77%)     |
|                            | $\tau_{av} = 1.17$       | $\tau_3 = 2.89$ (21%)        | $\tau_3 = 2.98$ (5%)     | $\tau_3 = 4.20$ (19%)    | $\tau_3 = 5.0$ (8%)       |
|                            |                          | $\tau_{av} = 2.47$           | $\tau_{av} = 2.40$       | $\tau_{av} = 2.82$       | $\tau_{av} = 2.63$        |

**Table S4** Fluorescence lifetime data for **EAPBA** in different solvents obtained by excitation at 330 nm and monitoring at 440 nm and 660 nm.

| Solvent                    | CHX<br>( $\pm 0.01$ ) ns | Toluene<br>( $\pm 0.01$ ) ns | THF<br>( $\pm 0.01$ ) ns | DCE<br>( $\pm 0.01$ ) ns | MeCN<br>( $\pm 0.01$ ) ns |
|----------------------------|--------------------------|------------------------------|--------------------------|--------------------------|---------------------------|
| $\lambda_{em} = 440$<br>nm | $\tau_1 = 0.14$ (51%)    | $\tau_1 = 0.68$ (26%)        | $\tau_1 = 0.51$ (44%)    | $\tau_1 = 0.67$ (31%)    | $\tau_1 = 0.86$ (22%)     |
|                            | $\tau_2 = 2.04$ (38%)    | $\tau_2 = 2.1$ (45%)         | $\tau_2 = 2.2$ (8%)      | $\tau_2 = 2.5$ (42%)     | $\tau_2 = 2.76$ (44%)     |
|                            | $\tau_3 = 6.5$ (11%)     | $\tau_3 = 5.3$ (29%)         | $\tau_3 = 5.34$ (48%)    | $\tau_3 = 7.7$ (27%)     | $\tau_3 = 6.17$ (34%)     |
|                            | $\tau_{av} = 1.56$       | $\tau_{av} = 2.65$           | $\tau_{av} = 2.96$       | $\tau_{av} = 3.33$       | $\tau_{av} = 3.50$        |
| $\lambda_{em} = 660$<br>nm | $\tau_1 = 0.56$ (21%)    | $\tau_1 = 0.60$ (48%)        | $\tau_1 = 0.28$ (35%)    | $\tau_1 = 0.59$ (45%)    | $\tau_1 = 0.15$ (37%)     |
|                            | $\tau_2 = 1.15$ (67%)    | $\tau_2 = 1.51$ (44%)        | $\tau_2 = 1.18$ (62%)    | $\tau_2 = 1.49$ (48%)    | $\tau_2 = 1.09$ (60%)     |
|                            | $\tau_3 = 3.03$ (12%)    | $\tau_3 = 6.58$ (8%)         | $\tau_3 = 5.04$ (3%)     | $\tau_3 = 5.41$ (7%)     | $\tau_3 = 3.78$ (3%)      |
|                            | $\tau_{av} = 1.25$       | $\tau_{av} = 1.48$           | $\tau_{av} = 0.98$       | $\tau_{av} = 1.36$       | $\tau_{av} = 0.82$        |

## References

1. Y. Li, Q. Guo, Z. Li, J. Pei, W. Tian, *Energy Environ. Sci.* 2010, 3, 1427–1436.

2. C. S. Kramer, K. Zeitler, T. J. Muller, *J. Org. Lett.* 2000, 2, 3723–3726.
